# Supplementary material
Source: Copernicus journal article supplement (doi:10.5194/egusphere-2026-2550)
Supplement: Supplementary file 1 [file egusphere-2026-2550-supplement.pdf]

## Supplement S1. Setting the activity factors in the MEGAN model

### S1.1 Activity factor for light dependency $\gamma_P$

The light dependent activity factor  $\gamma_P$  was calculated every 10 min using the following equations.

$$\gamma_P = 0 \text{ for } \sin(a) < 0 \quad (5a)$$

$$\gamma_P = \sin(a) \{2.46 \cdot [1 + 0.005 \cdot (P_{\text{daily}} - 400)] \cdot \phi - 0.9 \cdot \phi^2\} \text{ for } \sin(a) > 0 \quad (5b)$$

$$\phi = \frac{P_{\text{ac}}}{(\sin(a) \cdot P_{\text{toa}})} \quad (6)$$

$$P_{\text{toa}} = 3000 + 99 \cdot \cos\left(2 \cdot 3.14 \cdot \frac{(\text{DOY} - 10)}{365}\right) \quad (7)$$

where,  $a$  is solar angle (degrees),  $P_{\text{daily}}$  is daily average above canopy PPFD ( $\mu\text{mol} \cdot \text{m}^{-2} \cdot \text{s}^{-1}$ ),  $\phi$  is above canopy PPFD transmission (non-dimensional),  $P_{\text{ac}}$  is above canopy PPFD ( $\mu\text{mol} \cdot \text{m}^{-2} \cdot \text{s}^{-1}$ ),  $P_{\text{toa}}$  is PPFD at the top of the atmosphere ( $\mu\text{mol} \cdot \text{m}^{-2} \cdot \text{s}^{-1}$ ), DOY is day of year. The solar angle  $a$  was calculated from the latitude of FM Tama, the solar declination, and the hour angle.

### S1.2 Activity factor for temperature dependency $\gamma_T$

The temperature dependent activity function  $\gamma_T$  was calculated using the following equations.

$$\gamma_T = \frac{E_{\text{opt}} \cdot C_{T2} \cdot \exp(C_{T1} \cdot \chi)}{\{C_{T2} - C_{T1} \cdot [1 - \exp(C_{T2} \cdot \chi)]\}} \quad (8)$$

$$\chi = \frac{\left[\left(\frac{1}{T_{\text{opt}}}\right) - \left(\frac{1}{T_{\text{hr}}}\right)\right]}{0.00831} \quad (9)$$

$$E_{\text{opt}} = 1.75 \cdot \exp\left(0.08 \cdot (T_{\text{daily}} - 297)\right) \quad (10)$$

$$T_{\text{opt}} = 313 + 0.6 \cdot (T_{240} - 297) \quad (11)$$

where,  $T_{\text{hr}}$  is hourly average air temperature (K),  $T_{\text{daily}}$  is daily average air temperature (K),  $E_{\text{opt}}$  is the maximum normalized emission capacity,  $T_{\text{opt}}$  is the temperature at which  $E_{\text{opt}}$  occurs,  $T_{240}$  is the average air temperature over the past 240 h (K), and  $C_{T1}$  ( $=80 \text{ kJ} \cdot \text{mol}^{-1}$ ) and  $C_{T2}$  ( $=200 \text{ kJ} \cdot \text{mol}^{-1}$ ) are empirical coefficients which represent the energy of activation and deactivation, respectively (Guenther et al., 1999, 2006). Note that when calculating the 10-min value of  $\gamma_T$ , the corresponding hourly average air temperature  $T_{\text{hr}}$  for that time point was used.

### S1.3 Activity factor for LAI $\gamma_{\text{LAI}}$

An activity factor for LAI is estimated as following equation (12):

$$\gamma_{\text{LAI}} = \frac{0.49 \cdot \text{LAI}}{\sqrt{1 + 0.2 \cdot \text{LAI}^2}} \quad (12)$$

As LAI observations are obtained irregularly on a daily basis, the calculation formula uses the LAI value from the observation date closest in time.

#### S1.4 Activity factor for leaf age $\gamma_{\text{age}}$

The leaf age activity factor is estimated as following equation (13).

$$\gamma_{\text{age}} = F_{\text{new}} \cdot A_{\text{new}} + F_{\text{gro}} \cdot A_{\text{gro}} + F_{\text{mat}} \cdot A_{\text{mat}} + F_{\text{old}} \cdot A_{\text{old}} \quad (13)$$

where  $F$  represents the proportion of leaves,  $A$  denotes leaf age-specific activity factor, and the subscripts new, gro, mat, and old indicate new leaves, growing leaves, mature leaves, and old leaves, respectively. The values for  $A$  for isoprene are summarized in the table of Guenther et al. (2012), with  $A_{\text{new}}=0.05$ ,  $A_{\text{gro}}=0.6$ ,  $A_{\text{mat}}=1.0$ , and  $A_{\text{old}}=0.9$ .

Based on field observations of *Q. serrata* at FM Tama each month, the leaves sprout from April to May, reach maturity from June to mid-September, turn red and fall from mid-October to November, and few dead leaves remain on the branches from December to March. Based on the local phenological knowledge described above, the  $F$  values for each leaf age category per month were set as shown in Table below. Note that since leaves are absent from December to March,  $\gamma_{\text{age}}$  was set to 0.

Table  $F_{\text{new}}$ ,  $F_{\text{gro}}$ ,  $F_{\text{mat}}$ ,  $F_{\text{old}}$  for each month.

|                        | $F_{\text{new}}$ | $F_{\text{gro}}$ | $F_{\text{mat}}$ | $F_{\text{old}}$ |
|------------------------|------------------|------------------|------------------|------------------|
| January <sup>1)</sup>  | 0                | 0                | 0                | 0                |
| February <sup>1)</sup> | 0                | 0                | 0                | 0                |
| March <sup>1)</sup>    | 0                | 0                | 0                | 0                |
| April                  | 0.8              | 0.2              | 0                | 0                |
| May                    | 0.2              | 0.6              | 0.2              | 0                |
| June                   | 0.05             | 0.1              | 0.8              | 0.05             |
| July                   | 0.05             | 0.1              | 0.8              | 0.05             |
| August                 | 0.05             | 0.1              | 0.8              | 0.05             |
| September              | 0                | 0                | 0.5              | 0.5              |
| October                | 0                | 0                | 0.2              | 0.8              |
| November               | 0                | 0                | 0                | 1.0              |
| December <sup>1)</sup> | 0                | 0                | 0                | 0                |

1) From December to March, all  $F$  values for the *Q. serrata* were set to 0.

#### S1.5 Activity factors for soil moisture $\gamma_{\text{SM}}$ and carbon dioxide $\gamma_{\text{CO}_2}$

Soil moisture (volumetric water content,  $\text{m}^3/\text{m}^3$ ) obtained from the ERA5-Land (Muñoz-Sabater et al., 2021), a land surface-specific dataset provided by the European Centre for Medium-Range Weather Forecasts (ECMWF). Soil moisture varies significantly with depth, and whether plants can absorb water depends on root depth (Guenther et al., 2006). We calculated weighted daily averages of

soil moisture content at a spatial resolution of  $0.1^\circ$  for three soil layers (layer 1: 0–7 cm, layer 2: 7–28 cm, layer 3: 28–100 cm) around FM Tama during the calculation period. These values ranged from 0.17–0.43. Based on this data-set, we determined that this forest was likely not experiencing water stress and  $\gamma_{SM}$  was set to 1 for the entire period.

As the area surrounding FM Tama is residential, and  $CO_2$  concentrations during the observation period are expected to show no significant variation from those in the general atmospheric environment, the influence of  $CO_2$  on isoprene emissions is considered constant. Therefore,  $\gamma_{CO_2}$  was set to 1 for the entire period.

## References

Muñoz-Sabater, J., Dutra, E., Agustí-Panareda, A., Albergel, C., Arduini, G., Balsamo, G., Boussetta, S., Choulga, M., Harrigan, S., Hersbach, H., Martens, B., Miralles, D. G., Piles, M., Rodríguez-Fernández, N. J., Zsoter, E., Buontempo, C., and Thépaut, J.-N.: ERA5-Land: a state-of-the-art global reanalysis dataset for land applications, *Earth Syst. Sci. Data*, 13, 4349-4383, <https://doi.org/10.5194/essd-13-4349-2021>, 2021.

Guenther, A., Baugh, B., Brasseur, G., Greenberg, J., Harley, P., Serca, D., and Vierling, L.: Isoprene emission estimates and uncertainties for the central African EXPRESSO study domain, *J. Geophys. Res.*, 104, 30625-30639, <https://doi.org/10.1029/1999JD900391>, 1999.

Guenther, A. B., Karl, T., Harley, P., Wiedinmyer, C., Palmer, P. I., and Geron, C.: Estimates of global terrestrial isoprene emissions using MEGAN (Model of Emissions of Gases and Aerosols from Nature), *Atmos. Chem. Phys.*, 6, 3181-3210, <https://doi.org/10.5194/acp-6-3181-2006>, 2006.

Guenther, A. B., Jiang, X., Heald, C. L., Sakulyanontvittaya, T., Duhl, T., Emmons, L. K., Wang, X.: The Model of Emissions of Gases and Aerosols from Nature version 2.1 (MEGAN2.1): an extended and updated framework for modeling biogenic emissions, *Geosci. Model Dev.*, 5, 1471-1492, <https://doi.org/10.5194/gmd-5-1471-2012>, 2012.

## Supplement Figures

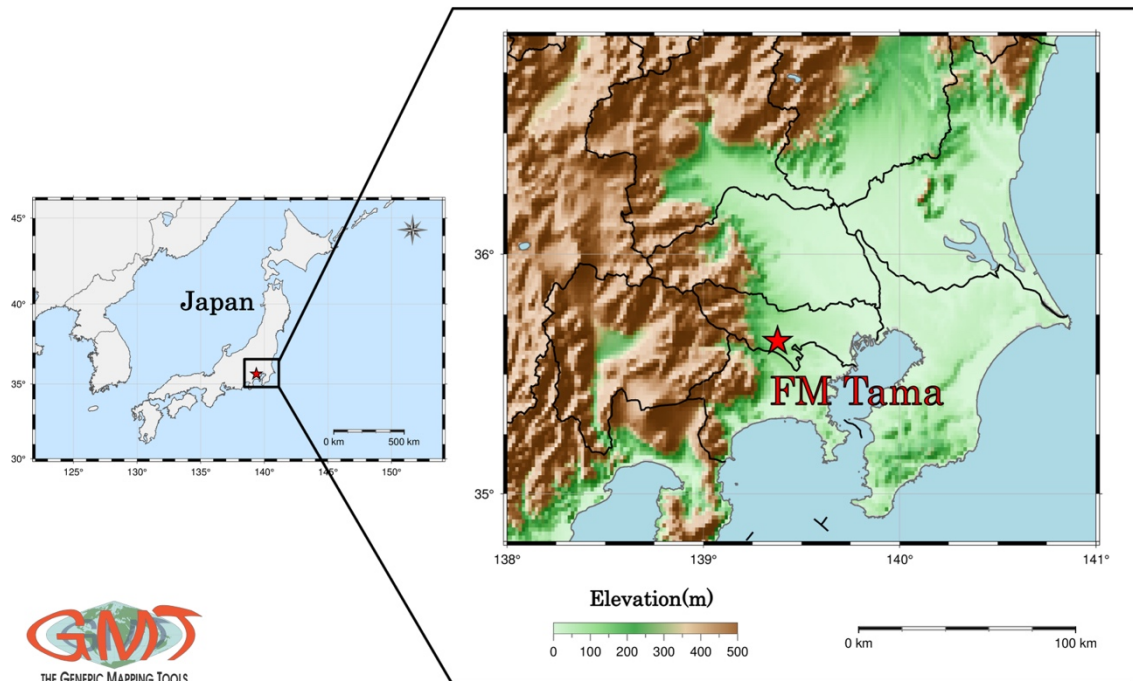

**Figure S1:** Figure S1 Location Map of the Tokyo University of Agriculture and Technology Field Museum Tamakyuryo (FM Tama).

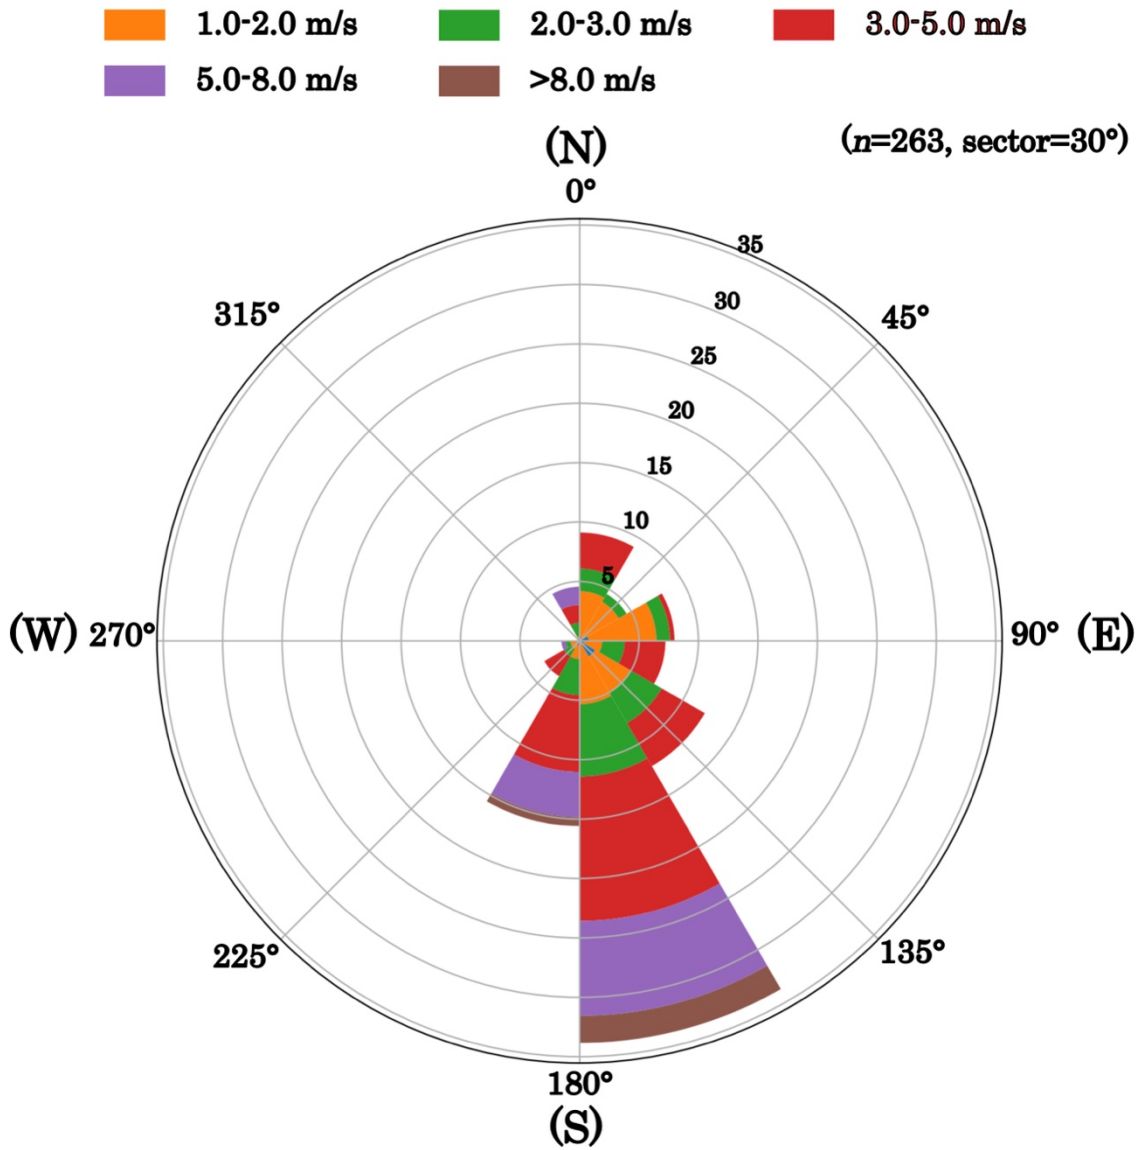

Figure S2: Wind rose for observation dates and times from June 2023 to October 2025.

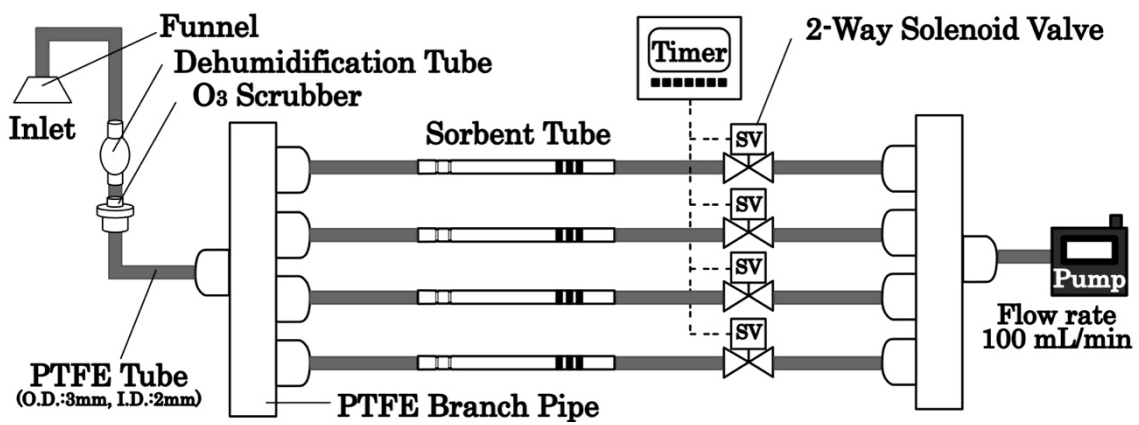

Figure S3: Schematic diagram of the in-house sampling device.

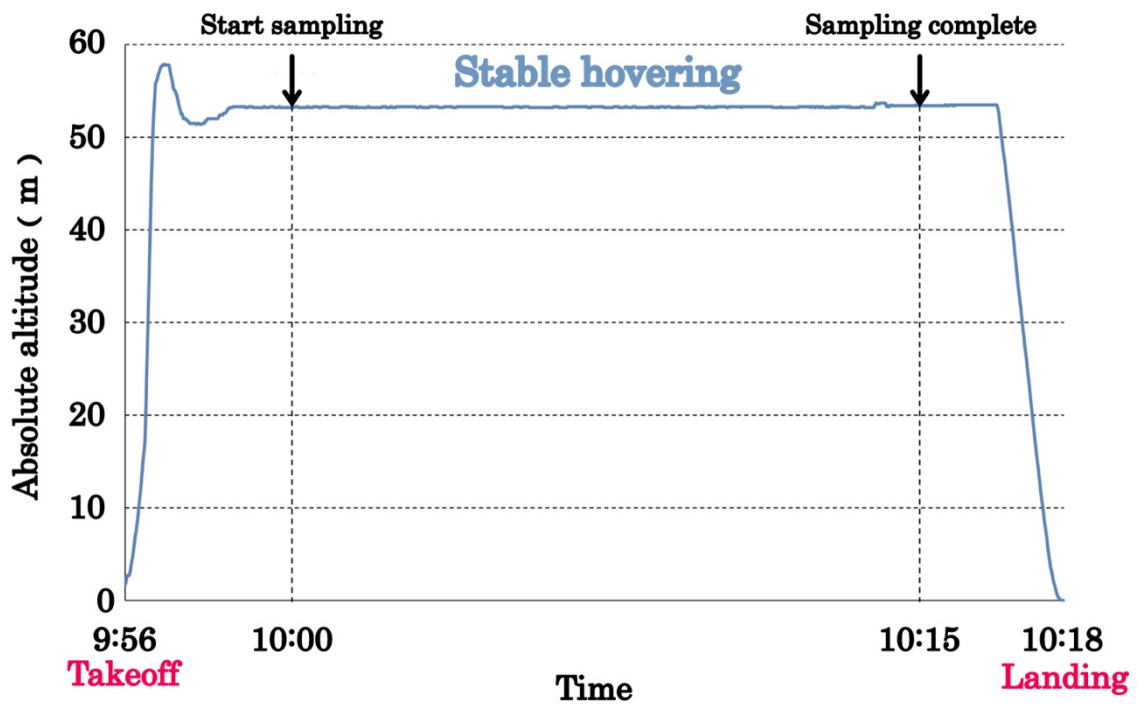

Figure S4: Drone flight altitude chart.

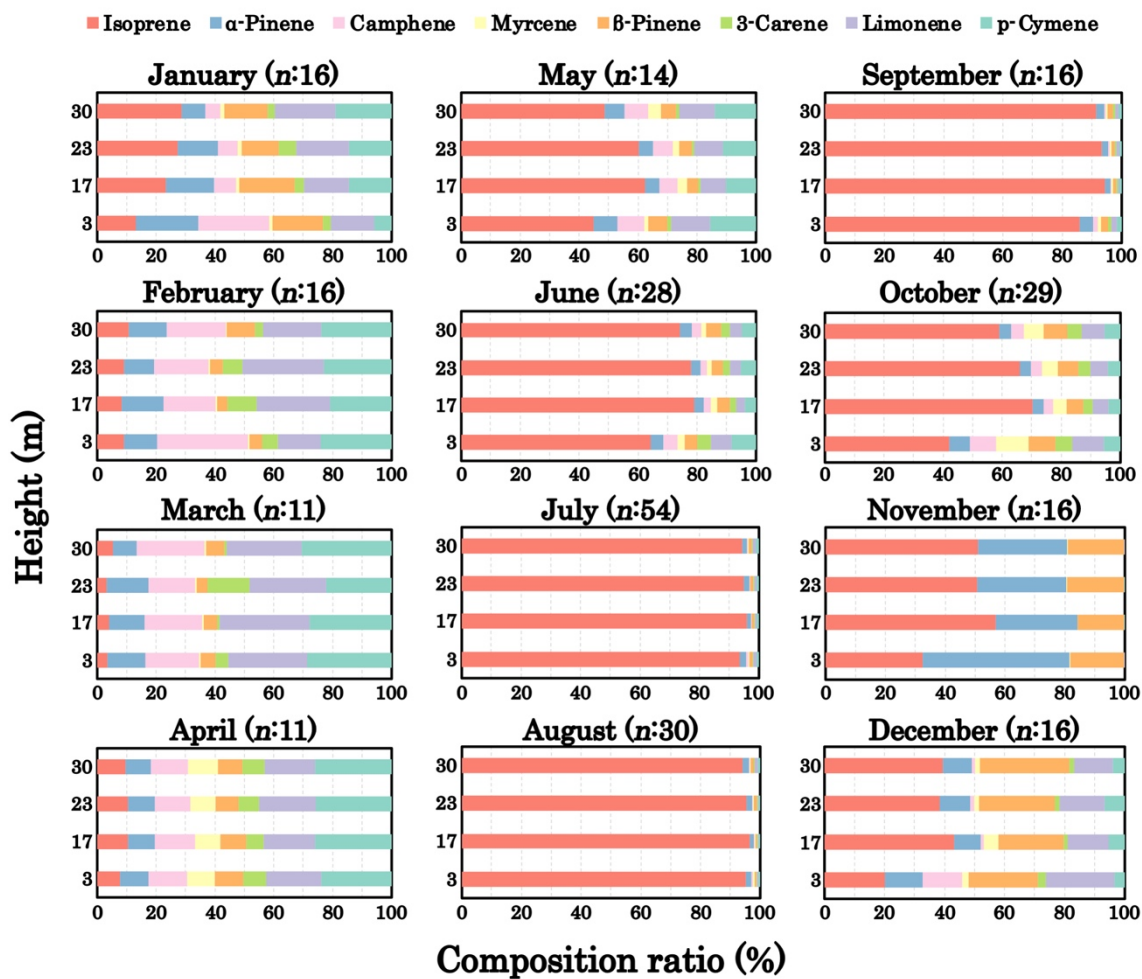

Figure S5: Stacked bar chart of the monthly average composition ratios (%) of each BVOC component by height over a 3-year period.

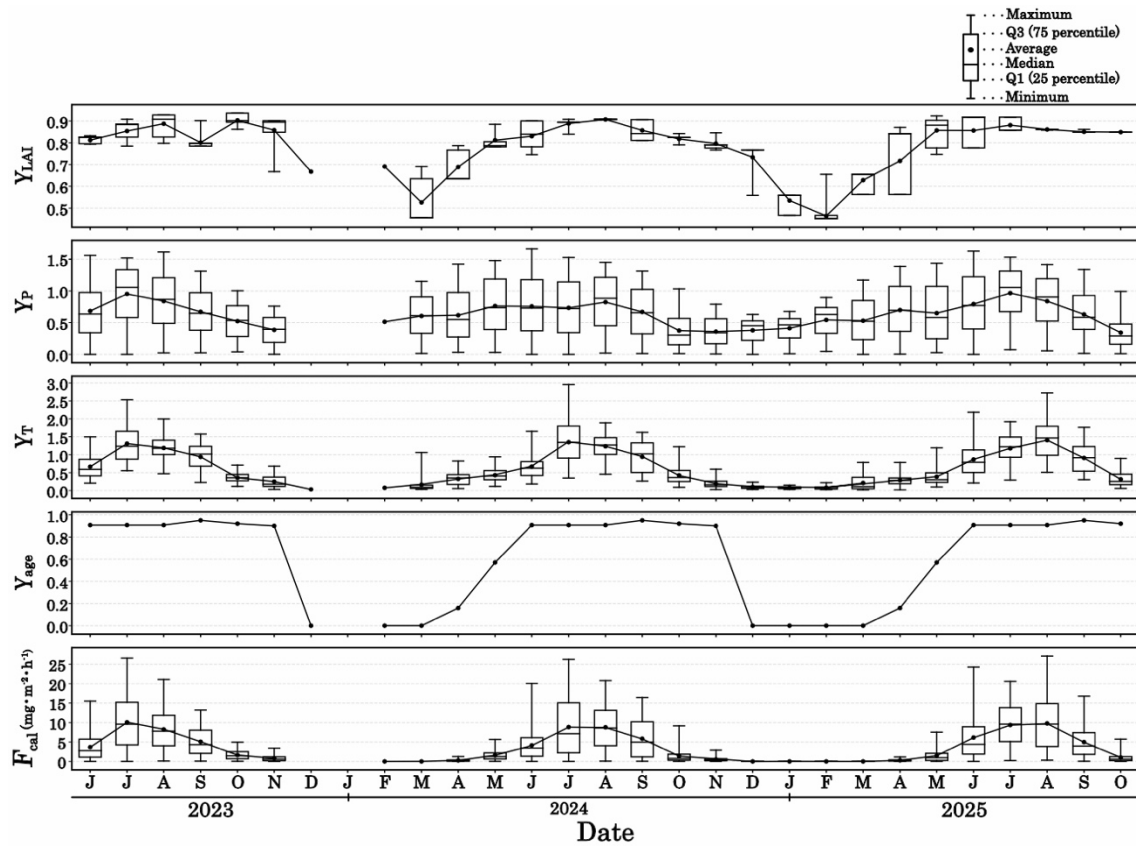

**Figure S6: Monthly variation in the overlay of average values on the boxplots of  $F_{cal}$  and  $\gamma_{LAI}$ ,  $\gamma_P$ ,  $\gamma_T$ ,  $\gamma_{age}$  calculated by MEGAN model.**

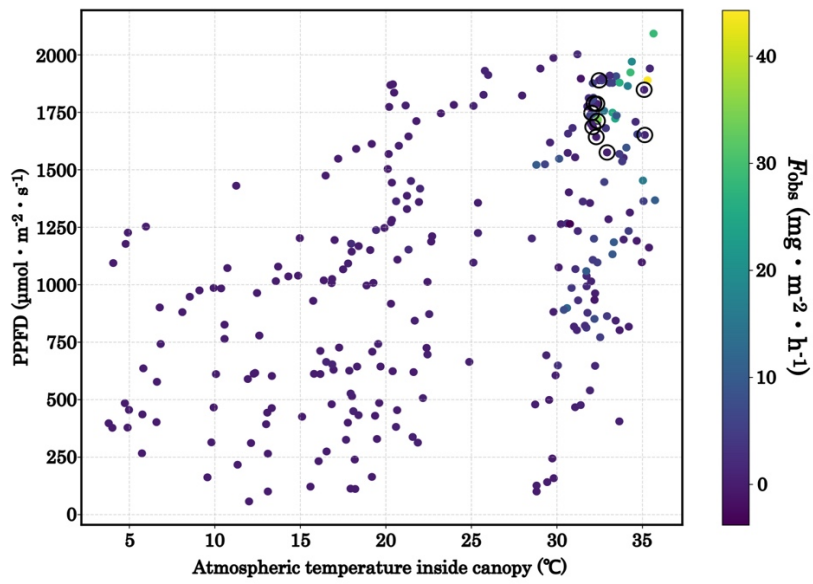

**Figure S7: Three-dimensional scatter plot of temperature inside canopy (x-axis), PPFD (y-axis), and  $F_{\text{obs}}$  (z-axis). The black-circled plots indicate L- $F_{\text{obs}}$  where both temperature and PPFD exceeded their respective 75<sup>th</sup> percentile values, yet  $F_{\text{obs}}$  fell below the 25<sup>th</sup> percentile value for that subset.**

Table S1. Observation date and time and general meteorological data at FM Tama.

| Observation date |       |    |              |     |       | Atmos. |   | PPFD                               |     |   | Relative      |    |                      | Wind          |   | Wind     |               |    |   |   |               |
|------------------|-------|----|--------------|-----|-------|--------|---|------------------------------------|-----|---|---------------|----|----------------------|---------------|---|----------|---------------|----|---|---|---------------|
| Ye               | Mont  | D  | at           | Sea | Samp  | Temp.  |   | (μmol ·                            |     |   | Humidity      |    |                      | Direction     |   | Velocity |               |    |   |   |               |
|                  |       |    |              |     |       | (°C)   |   | m <sup>-2</sup> ·s <sup>-1</sup> ) | (%) |   | (degree)      |    | (m·s <sup>-1</sup> ) |               |   |          |               |    |   |   |               |
| ar               | h     | e  | Time (JST)   | son | Time  | A      | ± | St                                 | A   | ± | St            | A  | ±                    | St            | M | -        | M             | A  | ± | S |               |
|                  |       |    |              | 2)  | (min) | v      |   | d.                                 | v   |   | d.            | ve |                      | d.            | i |          | a             | ve |   | t |               |
|                  |       |    |              |     |       | e      |   | <sup>3)</sup>                      | e   |   | <sup>3)</sup> | .  |                      | <sup>3)</sup> | n |          | x             | .  |   | d |               |
|                  |       |    |              |     |       | .      |   | .                                  | .   |   | .             |    |                      | .             |   |          | <sup>3)</sup> | .  |   | . | <sup>3)</sup> |
| 20               | June  | 29 | 10:00-12:00, | Su  | 30    | 3      | ± | 1.                                 | 1   | ± | 61            | 5  | ±                    | 3.            | 5 | -        | 2             | 1. | ± | 0 |               |
| 23               |       |    | 14:00-16:00  | m   |       | 0      |   | 2                                  | 4   |   | 5             | 8. |                      | 9             | 5 |          | 2             | 6  |   | . |               |
|                  |       |    |              | me  |       | .      |   |                                    | 5   |   |               | 4  |                      |               |   |          | 0             |    |   | 5 |               |
|                  |       |    |              | r   |       | 0      |   |                                    | 6   |   |               |    |                      |               |   |          |               |    |   |   |               |
|                  | July  | 18 | 10:00-12:00, | Su  | 30    | 3      | ± | 0.                                 | 1   | ± | 54            | 4  | ±                    | 2.            | 3 | -        | 3             | 2. | ± | 1 |               |
|                  |       |    | 14:00-16:00  | m   |       | 4      |   | 5                                  | 4   |   | 1             | 8. |                      | 5             |   |          | 4             | 2  |   | . |               |
|                  |       |    |              | me  |       | .      |   |                                    | 1   |   |               | 6  |                      |               |   |          | 9             |    |   | 5 |               |
|                  |       |    |              | r   |       | 1      |   |                                    | 7   |   |               |    |                      |               |   |          |               |    |   |   |               |
|                  | July  | 28 | 10:00-10:15, | Su  | 15    | 3      | ± | 0.                                 | 1   | ± | 27            | 6  | ±                    | 2.            | 1 | -        | 2             | 4. | ± | 1 |               |
|                  |       |    | 11:00-11:15, | m   |       | 0      |   | 8                                  | 6   |   | 2             | 3. |                      | 8             | 1 |          | 0             | 8  |   | . |               |
|                  |       |    | 12:00-12:15, | me  |       | .      |   |                                    | 5   |   |               | 0  |                      |               |   |          | 7             | 3  |   | 5 |               |
|                  |       |    | 14:00-14:15, | r   |       | 6      |   |                                    | 0   |   |               |    |                      |               |   |          |               |    |   |   |               |
|                  |       |    | 15:00-15:15  |     |       |        |   |                                    |     |   |               |    |                      |               |   |          |               |    |   |   |               |
|                  | July  | 31 | 10:00-11:30, | Su  | 30    | 3      | ± | 0.                                 | 1   | ± | 50            | 5  | ±                    | 2.            | 1 | -        | 2             | 4. | ± | 0 |               |
|                  |       |    | 14:00-15:30  | m   |       | 1      |   | 3                                  | 5   |   | 9             | 7. |                      | 1             | 5 |          | 0             | 3  |   | . |               |
|                  |       |    |              | me  |       | .      |   |                                    | 3   |   |               | 6  |                      |               |   |          | 4             | 3  |   | 8 |               |
|                  |       |    |              | r   |       | 7      |   |                                    | 4   |   |               |    |                      |               |   |          |               |    |   |   |               |
|                  | Augu  | 8  | 10:00-12:00, | Su  | 30    | 3      | ± | 0.                                 | 9   | ± | 41            | 6  | ±                    | 3.            | 3 | -        | 3             | 2. | ± | 1 |               |
|                  | st    |    | 14:00-16:00  | m   |       | 0      |   | 6                                  | 1   |   | 9             | 5. |                      | 1             | 2 |          | 0             | 0  |   | . |               |
|                  |       |    |              | me  |       | .      |   |                                    | 3   |   |               | 7  |                      |               |   |          | 3             |    |   | 4 |               |
|                  |       |    |              | r   |       | 2      |   |                                    |     |   |               |    |                      |               |   |          |               |    |   |   |               |
|                  | Septe | 28 | 10:00-12:00, | Au  | 30    | 2      | ± | 1.                                 | 1   | ± | 36            | 6  | ±                    | 6.            | 2 | -        | 1             | 1. | ± | 0 |               |
|                  | mber  |    | 14:00-16:00  | tu  |       | 9      |   | 8                                  | 2   |   | 3             | 3. |                      | 8             |   |          | 9             | 6  |   | . |               |
|                  |       |    |              | mn  |       | .      |   |                                    | 1   |   |               | 7  |                      |               |   |          | 4             |    |   | 7 |               |
|                  |       |    |              |     |       | 9      |   |                                    | 9   |   |               |    |                      |               |   |          |               |    |   |   |               |
|                  | Octo  | 12 | 10:00-10:15, | Au  | 15    | 2      | ± | 0.                                 | 1   | ± | 45            | 5  | ±                    | 3.            | 8 | -        | 3             | 1. | ± | 0 |               |

|     |  |              |    |   |   |   |   |    |   |   |   |   |
|-----|--|--------------|----|---|---|---|---|----|---|---|---|---|
| ber |  | 11:00-11:15, | tu | 0 | 7 | 0 | 5 | 1. | 5 | 5 | 2 | . |
|     |  | 12:00-12:15, | mn | . |   | 7 |   | 0  |   | 7 |   | 3 |
|     |  | 14:00-14:15, |    | 8 |   | 9 |   |    |   |   |   |   |
|     |  | 15:00-15:15, |    |   |   |   |   |    |   |   |   |   |
|     |  | 16:00-16:15  |    |   |   |   |   |    |   |   |   |   |

|      |    |              |    |    |   |   |    |   |   |    |    |   |    |   |   |   |    |   |   |
|------|----|--------------|----|----|---|---|----|---|---|----|----|---|----|---|---|---|----|---|---|
| Octo | 24 | 10:00-12:00, | Au | 30 | 2 | ± | 0. | 1 | ± | 35 | 4  | ± | 5. | 5 | - | 3 | 1. | ± | 0 |
| ber  |    | 14:00-16:00  | tu |    | 0 |   | 8  | 0 |   | 5  | 9. |   | 0  |   |   | 5 | 1  |   | . |
|      |    |              | mn |    | . |   |    | 4 |   | 0  |    |   |    |   |   | 7 |    |   | 3 |
|      |    |              |    |    | 8 |   |    | 0 |   |    |    |   |    |   |   |   |    |   |   |

|      |    |              |    |    |   |   |    |   |   |    |    |   |    |   |   |   |    |   |   |
|------|----|--------------|----|----|---|---|----|---|---|----|----|---|----|---|---|---|----|---|---|
| Nove | 30 | 10:00-12:00, | Au | 30 | 1 | ± | 1. | 7 | ± | 35 | 4  | ± | 5. | 1 | - | 3 | 1. | ± | 0 |
| mber |    | 14:00-16:00  | tu |    | 3 |   | 3  | 3 |   | 1  | 0. |   | 8  | 4 |   | 5 | 4  |   | . |
|      |    |              | mn |    | . |   |    | 4 |   | 1  |    |   |    |   |   | 4 |    |   | 7 |
|      |    |              |    |    | 5 |   |    |   |   |    |    |   |    |   |   |   |    |   |   |

|                   |    |              |     |    |   |   |    |   |  |    |  |  |   |   |   |    |   |   |
|-------------------|----|--------------|-----|----|---|---|----|---|--|----|--|--|---|---|---|----|---|---|
| Dece              | 26 | 10:00-12:00, | Wi  | 30 | 1 | ± | 0. | N |  | N  |  |  | 1 | - | 2 | 6. | ± | 1 |
| mber <sup>1</sup> |    | 14:00-16:00  | nte |    | 1 |   | 7  | o |  | o  |  |  | 8 |   | 0 | 1  |   | . |
| )                 |    |              | r   |    | . |   |    | D |  | D  |  |  | 0 |   | 3 |    |   | 4 |
|                   |    |              |     |    | 4 |   |    | a |  | at |  |  |   |   |   |    |   |   |
|                   |    |              |     |    |   |   |    | t |  | a  |  |  |   |   |   |    |   |   |
|                   |    |              |     |    |   |   |    | a |  |    |  |  |   |   |   |    |   |   |

---

|    |                  |    |              |     |    |   |   |    |   |    |   |  |   |   |   |    |   |   |
|----|------------------|----|--------------|-----|----|---|---|----|---|----|---|--|---|---|---|----|---|---|
| 20 | Janua            | 18 | 10:00-12:00, | Wi  | 30 | 1 | ± | 0. | N |    | N |  | 2 | - | 3 | 2. | ± | 1 |
| 24 | ry <sup>1)</sup> |    | 14:00-16:00  | nte |    | 3 |   | 2  | o | o  |   |  | 0 |   | 6 | 2  |   | . |
|    |                  |    |              | r   |    | . |   |    | D | D  |   |  | 3 |   | 0 |    |   | 1 |
|    |                  |    |              |     |    | 3 |   |    | a | at |   |  |   |   |   |    |   |   |
|    |                  |    |              |     |    |   |   |    | t | a  |   |  |   |   |   |    |   |   |
|    |                  |    |              |     |    |   |   |    | a |    |   |  |   |   |   |    |   |   |

|                   |    |              |     |    |   |   |    |   |  |    |  |  |   |   |   |    |   |   |
|-------------------|----|--------------|-----|----|---|---|----|---|--|----|--|--|---|---|---|----|---|---|
| Febru             | 15 | 10:00-12:00, | Wi  | 30 | 1 | ± | 1. | N |  | N  |  |  | 1 | - | 1 | 7. | ± | 2 |
| ary <sup>1)</sup> |    | 14:00-16:00  | nte |    | 8 |   | 3  | o |  | o  |  |  | 5 |   | 8 | 4  |   | . |
|                   |    |              | r   |    | . |   |    | D |  | D  |  |  | 8 |   | 0 |    |   | 5 |
|                   |    |              |     |    | 8 |   |    | a |  | at |  |  |   |   |   |    |   |   |
|                   |    |              |     |    |   |   |    | t |  | a  |  |  |   |   |   |    |   |   |
|                   |    |              |     |    |   |   |    | a |  |    |  |  |   |   |   |    |   |   |

|      |    |              |     |    |   |   |    |   |   |    |    |   |    |   |   |   |    |   |   |
|------|----|--------------|-----|----|---|---|----|---|---|----|----|---|----|---|---|---|----|---|---|
| Marc | 13 | 10:00-12:00, | Spr | 30 | 1 | ± | 0. | 1 | ± | 30 | 2  | ± | 3. | 0 | - | 2 | 5. | ± | 1 |
| h    |    | 14:00-16:00  | ing |    | 1 |   | 7  | 2 |   | 9  | 6. |   | 2  |   |   | 6 |    | . |   |
|      |    |              |     |    | . |   |    | 9 |   | 8  |    |   |    |   |   |   |    | 2 |   |
|      |    |              |     |    | 4 |   |    | 0 |   |    |    |   |    |   |   |   |    |   |   |

|       |    |              |     |    |   |   |    |   |   |    |   |   |    |   |   |   |    |   |   |
|-------|----|--------------|-----|----|---|---|----|---|---|----|---|---|----|---|---|---|----|---|---|
| April | 15 | 10:00-12:00, | Spr | 30 | 2 | ± | 0. | 1 | ± | 38 | 3 | ± | 3. | 1 | - | 1 | 4. | ± | 1 |
|-------|----|--------------|-----|----|---|---|----|---|---|----|---|---|----|---|---|---|----|---|---|

|      |       |              |              |     |    |      |      |      |      |      |      |     |     |     |     |
|------|-------|--------------|--------------|-----|----|------|------|------|------|------|------|-----|-----|-----|-----|
|      |       | 14:00-16:00  | ing          |     | 2  | 7    | 3    | 5    | 9.   | 2    | 1    | 8   | 4   | .   |     |
|      |       |              |              |     | .  |      | 9    |      | 6    |      | 8    | 9   |     | 6   |     |
|      |       |              |              |     | 1  |      | 1    |      |      |      |      |     |     |     |     |
| May  | 10    | 10:00-12:00, | Spr          | 30  | 1  | ± 0. | 1    | ± 31 | 2    | ± 5. | 1    | - 1 | 7.  | ± 1 |     |
|      |       | 14:00-16:00  | ing          |     | 9  | 3    | 5    | 6    | 8.   | 0    | 5    | 8   | 2   | .   |     |
|      |       |              |              |     | .  |      | 8    |      | 5    |      | 9    | 5   |     | 4   |     |
|      |       |              |              |     | 9  |      | 2    |      |      |      |      |     |     |     |     |
| June | 11    | 10:00-12:00, | Su           | 30  | 2  | ± 0. | 1    | ± 42 | 6    | ± 2. | 1    | - 1 | 5.  | ± 0 |     |
|      |       | 14:00-16:00  | m            |     | 5  | 3    | 4    | 1    | 1.   | 2    | 4    | 8   | 7   | .   |     |
|      |       |              | me           |     | .  |      | 7    |      | 4    |      | 7    | 3   |     | 8   |     |
|      |       |              | r            |     | 0  |      | 4    |      |      |      |      |     |     |     |     |
| July | 9     | 10:00-12:00, | Su           | 30  | 2  | ± 0. | 4    | ± 24 | 6    | ± 3. | 1    | - 2 | 2.  | ± 1 |     |
|      |       | 14:00-16:00  | m            |     | 9  | 5    | 3    | 8    | 5.   | 4    | 5    | 7   | 8   | .   |     |
|      |       |              | me           |     | .  |      | 0    |      | 1    |      | 7    | 2   |     | 3   |     |
|      |       |              | r            |     | 7  |      |      |      |      |      |      |     |     |     |     |
| July | 23    | 10:00-10:15, | Su           | 15  | 3  | ± 0. | 1    | ± 28 | 5    | ± 2. | 1    | - 2 | 3.  | ± 0 |     |
|      |       | 11:00-11:15, | m            |     | 2  | 7    | 6    | 1    | 9.   | 9    | 2    | 1   | 0   | .   |     |
|      |       | 12:00-12:15, | me           |     | .  |      | 5    |      | 8    |      | 5    | 5   |     | 6   |     |
|      |       | 14:00-14:15, | r            |     | 8  |      | 5    |      |      |      |      |     |     |     |     |
|      |       | 15:00-15:15, |              |     |    |      |      |      |      |      |      |     |     |     |     |
|      |       | 16:00-16:15  |              |     |    |      |      |      |      |      |      |     |     |     |     |
| Octo | 10    | 10:00-12:00, | Au           | 30  | 1  | ± 0. | 4    | ± 28 | 7    | ± 1. | 3    | - 3 | 3.  | ± 0 |     |
| ber  |       | 14:00-16:00  | tu           |     | 8  | 4    | 4    | 8    | 2.   | 6    |      | 5   | 0   | .   |     |
|      |       |              | mn           |     | .  |      | 8    |      | 9    |      |      | 9   |     | 4   |     |
|      |       |              |              |     | 2  |      |      |      |      |      |      |     |     |     |     |
| Nove | 12    | 10:00-12:00, | Au           | 30  | 1  | ± 0. | 8    | ± 33 | 6    | ± 2. | 2    | - 1 | 3.  | ± 0 |     |
| mber |       | 14:00-16:00  | tu           |     | 8  | 8    | 2    | 9    | 3.   | 2    | 9    | 7   | 2   | .   |     |
|      |       |              | mn           |     | .  |      | 7    |      | 5    |      |      | 2   |     | 9   |     |
|      |       |              |              |     | 6  |      |      |      |      |      |      |     |     |     |     |
| Dece | 4     | 10:00-12:00, | Wi           | 30  | 1  | ± 0. | 7    | ± 30 | 4    | ± 3. | 1    | - 3 | 2.  | ± 0 |     |
| mber |       | 14:00-16:00  | nte          |     | 5  | 4    | 3    | 9    | 1.   | 1    |      | 5   | 8   | .   |     |
|      |       |              | r            |     | .  |      | 9    |      | 4    |      |      | 9   |     | 6   |     |
|      |       |              |              |     | 7  |      |      |      |      |      |      |     |     |     |     |
| 20   | Janua | 16           | 10:00-12:00, | Wi  | 30 | 4    | ± 0. | 3    | ± 14 | 4    | ± 2. | 3   | - 1 | 2.  | ± 0 |
| 25   | ry    |              | 14:00-16:00  | nte |    | .    | 7    | 9    | 7    | 0.   | 1    | 7   | 7   | 4   | .   |
|      |       |              | r            |     | 5  |      | 0    |      | 7    |      |      | 1   |     | 8   |     |

|              |    |                                                                                             |                    |     |                           |                              |                      |                   |         |          |
|--------------|----|---------------------------------------------------------------------------------------------|--------------------|-----|---------------------------|------------------------------|----------------------|-------------------|---------|----------|
| Febru<br>ary | 6  | 10:00-12:00,<br>14:00-16:00                                                                 | Wi<br>nte<br>r     | 30  | 6 ± 1.<br>. 0<br>1        | 9 ± 32<br>8 7 3.<br>8 2      | 2 ± 2.<br>9 1        | 2 - 3<br>1 2      | 3.<br>5 | ± 0<br>. |
| Marc<br>h    | 27 | 10:00-16:00                                                                                 | Spr<br>ing         | 120 | 1 ± 1.<br>9 3<br>. 9<br>1 | 1 ± 42<br>1 2 8.<br>9 9<br>5 | 5 ± 4.<br>8 0<br>5   | 1 - 1<br>9 8<br>1 | 4.<br>8 | ± 2<br>. |
| April        | 16 | 10:00-16:00                                                                                 | Spr<br>ing         | 120 | 1 ± 1.<br>7 2<br>. 0<br>2 | 1 ± 31<br>5 8 0.<br>2        | 3 ± 3.<br>5 7        | 6 - 1<br>8 5<br>4 | 4.<br>5 | ± 1<br>. |
| May          | 7  | 10:00-16:00                                                                                 | Spr<br>ing         | 120 | 1 ± 0.<br>9 7<br>. 7<br>9 | 1 ± 55<br>3 1 1.<br>7 1<br>6 | 4 ± 2.<br>1          | 0 - 0<br>2        | 4.<br>2 | ± 0<br>. |
| May          | 29 | 10:00-16:00                                                                                 | Spr<br>ing         | 120 | 2 ± 4.<br>0 9<br>. 3<br>9 | 7 ± 36<br>4 5.<br>5 2 6<br>3 | 5 ± 1<br>3. 1<br>2 6 | 1 - 2<br>0 3<br>3 | 3.<br>3 | ± 1<br>. |
| July         | 7  | 10:00-12:00,<br>14:00-16:00                                                                 | Su<br>m<br>me<br>r | 30  | 3 ± 0.<br>1 4<br>. 4<br>6 | 1 ± 45<br>2 3 0.<br>4 2<br>7 | 6 ± 2.<br>7 8        | 8 - 2<br>4 9<br>0 | 2.<br>9 | ± 1<br>. |
| July         | 29 | 10:00-10:17,<br>11:00-11:17,<br>12:00-12:17,<br>14:00-14:17,<br>15:00-15:17,<br>16:00-16:17 | Su<br>m<br>me<br>r | 17  | 3 ± 0.<br>3 8<br>. 3<br>3 | 1 ± 37<br>6 3 9.<br>3 8      | 4 ± 3.<br>5          | 4 - 1<br>8 9<br>3 | 2.<br>9 | ± 1<br>. |
| Augu<br>st   | 6  | 10:00-12:00,<br>14:00-16:00                                                                 | Su<br>m<br>me<br>r | 30  | 3 ± 0.<br>4 5<br>. 8<br>8 | 1 ± 45<br>3 1 3.<br>8 5<br>0 | 5 ± 2.<br>3 5        | 2 - 2<br>5 0<br>3 | 3.<br>0 | ± 1<br>. |
| Augu<br>st   | 19 | 10:00-12:00,<br>13:00-15:00                                                                 | Su<br>m<br>me      | 30  | 3 ± 0.<br>1 8<br>. 1      | 1 ± 29<br>5 7 9.<br>5        | 5 ± 2.<br>9 2<br>4   | 1 - 2<br>1 2<br>0 | 3.<br>2 | ± 0<br>. |

|       |    |              |    |    |   |      |   |      |    |      |   |     |    |     |  |  |  |  |
|-------|----|--------------|----|----|---|------|---|------|----|------|---|-----|----|-----|--|--|--|--|
|       |    |              | r  | 9  | 2 |      |   |      |    |      |   |     |    |     |  |  |  |  |
| Septe | 9  | 10:00-12:00, | Au | 30 | 3 | ± 0. | 1 | ± 39 | 6  | ± 2. | 1 | - 1 | 3. | ± 1 |  |  |  |  |
| mber  |    | 13:00-15:00  | tu |    | 0 | 6    | 1 | 7    | 7. | 0    | 2 | 8   | 5  | .   |  |  |  |  |
|       |    |              | mn |    | . |      | 7 |      | 0  |      | 0 | 7   |    | 5   |  |  |  |  |
|       |    |              |    |    | 4 |      | 6 |      |    |      |   |     |    |     |  |  |  |  |
| Octo  | 28 | 10:00-12:00, | Au | 30 | 1 | ± 0. | 6 | ± 37 | 4  | ± 2. | 2 | - 1 | 1. | ± 0 |  |  |  |  |
| ber   |    | 13:00-15:00  | tu |    | 7 | 8    | 9 | 2    | 6. | 8    |   | 1   | 7  | .   |  |  |  |  |
|       |    |              | mn |    | . |      | 4 |      | 0  |      |   | 9   |    | 5   |  |  |  |  |
|       |    |              |    |    | 6 |      |   |      |    |      |   |     |    |     |  |  |  |  |

1) Due to equipment maintenance at the FM Tana, data acquisition was not possible; therefore, data from the nearest Hachioji air quality monitoring station was used.

2) Based on the Japan Meteorological Agency's definition, the seasons are assigned as follows: March to May is spring, June to August is summer, September to November is autumn, and December to February is winter.

3) Calculated from data at 10:00 AM-4:00 PM (JST) at 25-30m on the flux tower, except for the period from December 2023 to February 2024.

Table S2 Monthly average concentration of each BVOC component by altitude.

| Year | Month | Isoprene |     |     |     | $\alpha$ -Pinene |     |     |     | Camphene |    |    |    | Myrcene |    |    |    |   |
|------|-------|----------|-----|-----|-----|------------------|-----|-----|-----|----------|----|----|----|---------|----|----|----|---|
|      |       | 3m       | 17  | 23  | 30  | 3m               | 17  | 23  | 30  | 3        | 17 | 23 | 30 | 3m      | 17 | 23 | 30 |   |
|      |       | m        | m   | m   | m   | m                | m   | m   | m   | m        | m  | m  | m  | m       | m  | m  | m  |   |
| 2023 | 6     | 238      | 435 | 490 | 287 | 3                | 2   | 2   | 3   | 10       | 1  | 1  | 1  | 2       | 2  | 2  | 2  |   |
|      | 7     | 484      | 577 | 422 | 355 | 45               | 38  | 57  | 24  | 20       | 4  | 3  | 4  | 2       | 2  | 2  | 2  |   |
|      | 8     | 130      | 171 | 127 | 812 | 11               | 120 | 125 | 117 | 39       | 10 | 3  | 1  | 15      | 9  | 6  | 2  |   |
|      |       | 0        | 0   | 3   |     | 9                |     |     |     |          |    |    |    |         |    |    |    |   |
|      | 9     | 722      | 320 | 252 | 187 | 68               | 66  | 59  | 68  | 18       | 2  | 1  | 1  | 2       | 2  | 2  | 2  |   |
|      |       |          | 7   | 0   | 6   |                  |     |     |     |          |    |    |    |         |    |    |    |   |
|      | 10    | 223      | 658 | 491 | 382 | 49               | 37  | 31  | 29  | 65       | 42 | 40 | 39 | 10      | 66 | 68 | 66 |   |
|      |       |          |     |     |     |                  |     |     |     |          |    |    |    | 3       |    |    |    |   |
|      | 11    | 42       | 60  | 58  | 57  | 0                | 0   | 0   | 0   | 0        | 0  | 0  | 0  | 0       | 0  | 0  | 0  |   |
|      | 12    | 27       | 35  | 33  | 33  | 11               | 2   | 2   | 2   | 15       | 1  | 1  | 1  | 2       | 6  | 2  | 2  |   |
|      | 2024  | 1        | 33  | 49  | 51  | 58               | 57  | 25  | 14  | 2        | 42 | 10 | 8  | 6       | 2  | 2  | 2  | 2 |
|      |       | 2        | 58  | 69  | 70  | 73               | 49  | 99  | 51  | 63       | 11 | 85 | 80 | 78      | 2  | 2  | 2  | 2 |
|      |       |          |     |     |     |                  |     |     |     | 6        |    |    |    |         |    |    |    |   |
| 3    |       | 8        | 8   | 8   | 9   | 30               | 39  | 57  | 21  | 41       | 48 | 48 | 48 | 1       | 1  | 1  | 1  |   |
| 4    |       | 41       | 62  | 70  | 60  | 48               | 53  | 62  | 52  | 55       | 60 | 62 | 60 | 38      | 38 | 44 | 48 |   |
| 5    |       | 96       | 307 | 282 | 208 | 33               | 43  | 38  | 44  | 47       | 47 | 47 | 46 | 2       | 21 | 13 | 22 |   |
| 6    |       | 158      | 110 | 843 | 717 | 24               | 36  | 34  | 32  | 20       | 20 | 20 | 20 | 12      | 22 | 14 | 14 |   |
|      |       |          | 8   |     |     |                  |     |     |     |          |    |    |    |         |    |    |    |   |
| 7    |       | 256      | 485 | 395 | 350 | 39               | 77  | 70  | 64  | 13       | 18 | 18 | 17 | 9       | 14 | 19 | 14 |   |
|      |       |          | 0   | 4   | 1   | 1                |     |     |     |          |    |    |    |         |    |    |    |   |
| 8    |       | 600      | 523 | 473 | 373 | 9                | 36  | 35  | 27  | 2        | 16 | 15 | 7  | 17      | 24 | 28 | 12 |   |
|      |       |          | 9   | 2   | 6   |                  |     |     |     |          |    |    |    |         |    |    |    |   |
| 10   | 91    | 372      | 247 | 229 | 13  | 29               | 17  | 13  | 12  | 12       | 12 | 12 | 16 | 16      | 16 | 16 |    |   |
| 11   | 26    | 156      | 119 | 120 | 10  | 104              | 104 | 104 | -   | -        | -  | -  | -  | -       | -  | -  |    |   |
|      |       |          |     |     | 4   |                  |     |     |     |          |    |    |    |         |    |    |    |   |
| 12   | 19    | 64       | 43  | 49  | 18  | 18               | 18  | 18  | -   | -        | -  | -  | -  | -       | -  | -  |    |   |
| 2025 | 1     | 12       | 12  | 12  | 12  | 18               | 18  | 18  | 18  | -        | -  | -  | -  | -       | -  | -  |    |   |
|      | 2     | 9        | 9   | 9   | 9   | 36               | 37  | 36  | 36  | -        | -  | -  | -  | -       | -  | -  |    |   |
|      | 3     | -        | 15  | 16  | 16  | -                | 6   | 6   | 6   | -        | -  | -  | -  | -       | -  | -  |    |   |

|    |     |     |     |     |    |     |     |     |    |    |    |    |    |    |    |    |
|----|-----|-----|-----|-----|----|-----|-----|-----|----|----|----|----|----|----|----|----|
| 4  | 10  | 6   | 9   | 9   | 17 | 6   | 8   | 9   | -  | -  | -  | -  | -  | -  | -  | -  |
| 5  | 303 | 494 | 421 | 237 | 33 | 14  | 15  | 12  | 14 | 13 | 13 | 13 | 15 | 14 | 11 | 13 |
| 6  | -   | 237 | 275 | 183 | -  | 118 | 125 | 115 | -  | 91 | 92 | 91 | -  | 79 | 60 | 45 |
|    |     | 9   | 2   | 3   |    |     |     |     |    |    |    |    |    |    |    |    |
| 7  | 364 | 615 | 615 | 383 | 54 | 62  | 70  | 55  | 13 | 4  | 4  | 5  | 4  | 3  | 9  | 3  |
|    | 6   | 4   | 9   | 1   |    |     |     |     |    |    |    |    |    |    |    |    |
| 8  | 579 | 541 | 457 | 314 | 34 | 45  | 62  | 47  | 10 | 11 | 11 | 12 | 5  | 8  | 14 | 9  |
|    | 4   | 8   | 8   | 7   |    |     |     |     |    |    |    |    |    |    |    |    |
| 9  | 152 | 288 | 237 | 194 | 48 | 56  | 63  | 44  | 25 | 25 | 25 | 25 | 24 | 31 | 24 | 23 |
|    | 3   | 5   | 4   | 5   |    |     |     |     |    |    |    |    |    |    |    |    |
| 10 | 180 | 583 | 544 | 280 | 27 | 20  | 21  | 20  | 39 | 15 | 13 | 6  | 4  | 4  | 4  | 4  |

---

-: No data



|    |    |   |    |    |    |   |    |    |    |    |    |    |    |   |    |    |    |
|----|----|---|----|----|----|---|----|----|----|----|----|----|----|---|----|----|----|
|    |    | 2 |    |    |    |   |    |    |    |    |    |    |    |   |    |    |    |
| 20 | 1  | 3 | 47 | 27 | 34 | - | -  | -  | -  | -  | -  | -  | -  | - | -  | -  | -  |
| 25 |    | 2 |    |    |    |   |    |    |    |    |    |    |    |   |    |    |    |
|    | 2  | 1 | 31 | 37 | 37 | - | -  | -  | -  | -  | -  | -  | -  | - | -  | -  | -  |
|    |    | 1 |    |    |    |   |    |    |    |    |    |    |    |   |    |    |    |
|    | 3  | - | 23 | 24 | 28 | - | -  | -  | -  | -  | -  | -  | -  | - | -  | -  | -  |
|    | 4  | 2 | 22 | 23 | 24 | - | -  | -  | -  | -  | -  | -  | -  | - | -  | -  | -  |
|    |    | 7 |    |    |    |   |    |    |    |    |    |    |    |   |    |    |    |
|    | 5  | 3 | 23 | 24 | 23 | 1 | 14 | 14 | 13 | 22 | 17 | 18 | 17 | 4 | 45 | 45 | 45 |
|    |    | 4 |    |    |    | 5 |    |    |    |    |    |    | 5  |   |    |    |    |
|    | 6  | - | 15 | 16 | 15 | - | 75 | 99 | 86 | -  | 97 | 99 | 10 | - | 11 | 18 | 11 |
|    |    |   | 7  | 0  | 4  |   |    |    |    |    |    |    | 0  | 7 | 9  | 9  |    |
|    | 7  | 4 | 61 | 71 | 56 | 2 | 11 | 13 | 12 | 47 | 48 | 55 | 42 | 4 | 57 | 59 | 53 |
|    |    | 8 |    |    |    | 6 |    |    |    |    |    |    |    | 6 |    |    |    |
|    | 8  | 3 | 53 | 59 | 50 | 7 | 12 | 10 | 9  | 24 | 22 | 27 | 21 | 2 | 27 | 28 | 26 |
|    |    | 9 |    |    |    |   |    |    |    |    |    |    |    | 3 |    |    |    |
|    | 9  | 5 | 55 | 57 | 56 | 2 | 25 | 25 | 25 | 26 | 27 | 27 | 25 | 3 | 37 | 38 | 36 |
|    |    | 0 |    |    |    | 5 |    |    |    |    |    |    |    | 7 |    |    |    |
|    | 10 | 1 | 11 | 13 | 13 | 6 | 6  | 6  | 6  | 8  | 7  | 5  | 11 | 4 | 4  | 4  | 4  |
|    |    | 3 |    |    |    |   |    |    |    |    |    |    |    |   |    |    |    |

---

—: No data

Table S3 Monthly statistical values for  $F_{cal}$ ,  $\gamma_{LAI}$ ,  $\gamma_P$ ,  $\gamma_T$ , and  $\gamma_{age}$  during the observation period.

| Year | Month | $F_{cal}$ ( $mg \cdot m^{-2} \cdot h^{-1}$ ) |      |      |      |      |       | $\gamma_{LAI}$ |     |     |     |      |      |       |     |
|------|-------|----------------------------------------------|------|------|------|------|-------|----------------|-----|-----|-----|------|------|-------|-----|
|      |       | Mi                                           | Max  | Ave. | Std. | Q1   | Media | Q3             | Mi  | Ma  | Ave | Std. | Q1   | Media | Q3  |
|      |       | n                                            |      |      |      |      | n     |                | n   | x   | .   |      | n    |       |     |
| 2023 | 6     | 0.0                                          | 15.5 | 3.68 | 3.1  | 1.0  | 2.78  | 5.74           | 0.7 | 0.8 | 0.8 | 0.0  | 0.8  | 0.82  | 0.8 |
|      | 7     | 0.0                                          | 26.5 | 10.0 | 6.5  | 4.2  | 9.60  | 15.2           | 0.7 | 0.9 | 0.8 | 0.0  | 0.8  | 0.88  | 0.8 |
|      | 8     | 0.1                                          | 21.1 | 8.24 | 4.9  | 4.0  | 7.80  | 11.8           | 0.8 | 0.9 | 0.8 | 0.0  | 0.8  | 0.91  | 0.9 |
|      | 9     | 0.0                                          | 13.2 | 5.08 | 3.4  | 2.0  | 4.34  | 8.05           | 0.7 | 0.9 | 0.8 | 0.0  | 0.7  | 0.80  | 0.8 |
|      | 10    | 0.0                                          | 4.99 | 1.63 | 1.1  | 0.6  | 1.45  | 2.50           | 0.8 | 0.9 | 0.9 | 0.0  | 0.8  | 0.90  | 0.9 |
|      | 11    | 0.0                                          | 3.42 | 0.83 | 0.8  | 0.1  | 0.57  | 1.18           | 0.6 | 0.9 | 0.8 | 0.0  | 0.8  | 0.89  | 0.9 |
|      | 12    | -                                            | -    | -    | -    | -    | -     | -              | 0.6 | 0.6 | 0.6 | 0.0  | -    | -     | -   |
|      | 1     | -                                            | -    | -    | -    | -    | -     | -              | 0.6 | 0.6 | 0.6 | 0.0  | -    | -     | -   |
|      | 2     | 0.0                                          | 0.00 | 0.00 | 0.0  | 0.0  | 0.00  | 0.00           | 0.6 | 0.6 | 0.6 | 0.3  | -    | -     | -   |
|      | 3     | 0.0                                          | 0.00 | 0.00 | 0.0  | 0.0  | 0.00  | 0.00           | 0.4 | 0.6 | 0.5 | 0.1  | 0.4  | 0.46  | 0.6 |
|      | 4     | 0.0                                          | 1.26 | 0.25 | 0.2  | 0.0  | 0.17  | 0.39           | 0.6 | 0.7 | 0.6 | 0.0  | 0.6  | 0.63  | 0.7 |
|      | 5     | 0.0                                          | 5.68 | 1.57 | 1.2  | 0.6  | 1.26  | 2.19           | 0.7 | 0.8 | 0.8 | 0.0  | 0.7  | 0.79  | 0.8 |
| 6    | 0.0   | 20.0                                         | 4.15 | 3.4  | 1.3  | 3.45 | 6.13  | 0.7            | 0.9 | 0.8 | 0.0 | 0.7  | 0.84 | 0.9   |     |
| 7    | 0.0   | 26.2                                         | 8.85 | 7.1  | 2.2  | 7.15 | 15.0  | 0.8            | 0.9 | 0.8 | 0.0 | 0.8  | 0.89 | 0.8   |     |
| 8    | 0.0   | 20.8                                         | 8.79 | 5.5  | 4.0  | 8.60 | 13.1  | 0.9            | 0.9 | 0.9 | 0.0 | 0.9  | 0.91 | 0.9   |     |
| 9    | 0.0   | 16.4                                         | 5.86 | 4.6  | 1.1  | 5.00 | 10.2  | 0.8            | 0.9 | 0.8 | 0.0 | 0.8  | 0.84 | 0.9   |     |

|     |    |     |      |      |     |     |      |      |     |     |     |     |     |      |     |
|-----|----|-----|------|------|-----|-----|------|------|-----|-----|-----|-----|-----|------|-----|
|     | 10 | 0.0 | 9.16 | 1.37 | 1.6 | 0.3 | 0.77 | 1.86 | 0.7 | 0.8 | 0.8 | 0.0 | 0.8 | 0.82 | 0.8 |
|     |    | 1   |      |      | 0   | 1   |      |      | 9   | 4   | 2   | 2   | 2   |      | 2   |
|     | 11 | 0.0 | 2.89 | 0.53 | 0.5 | 0.1 | 0.38 | 0.69 | 0.7 | 0.8 | 0.8 | 0.0 | 0.7 | 0.79 | 0.7 |
|     |    | 0   |      |      | 0   | 7   |      |      | 7   | 5   | 0   | 3   | 8   |      | 9   |
|     | 12 | 0.0 | 0.00 | 0.00 | 0.0 | 0.0 | 0.00 | 0.00 | 0.5 | 0.7 | 0.7 | 0.0 | 0.7 | 0.77 | 0.7 |
|     |    | 0   |      |      | 0   | 0   |      |      | 6   | 7   | 3   | 8   | 7   |      | 7   |
| 202 | 1  | 0.0 | 0.00 | 0.00 | 0.0 | 0.0 | 0.00 | 0.00 | 0.4 | 0.5 | 0.5 | 0.0 | 0.4 | 0.56 | 0.5 |
| 5   |    | 0   |      |      | 0   | 0   |      |      | 7   | 6   | 3   | 4   | 7   |      | 6   |
|     | 2  | 0.0 | 0.00 | 0.00 | 0.0 | 0.0 | 0.00 | 0.00 | 0.4 | 0.6 | 0.4 | 0.0 | 0.4 | 0.45 | 0.4 |
|     |    | 0   |      |      | 0   | 0   |      |      | 5   | 6   | 6   | 4   | 5   |      | 7   |
|     | 3  | 0.0 | 0.00 | 0.00 | 0.0 | 0.0 | 0.00 | 0.00 | 0.5 | 0.6 | 0.6 | 0.0 | 0.5 | 0.66 | 0.6 |
|     |    | 0   |      |      | 0   | 0   |      |      | 6   | 6   | 3   | 4   | 6   |      | 6   |
|     | 4  | 0.0 | 1.15 | 0.27 | 0.2 | 0.0 | 0.21 | 0.41 | 0.5 | 0.8 | 0.7 | 0.1 | 0.5 | 0.84 | 0.8 |
|     |    | 0   |      |      | 3   | 9   |      |      | 6   | 7   | 2   | 5   | 6   |      | 4   |
|     | 5  | 0.0 | 7.53 | 1.46 | 1.5 | 0.2 | 0.95 | 2.09 | 0.7 | 0.9 | 0.8 | 0.0 | 0.7 | 0.88 | 0.9 |
|     |    | 2   |      |      | 7   | 6   |      |      | 5   | 2   | 6   | 7   | 8   |      | 0   |
|     | 6  | 0.0 | 24.2 | 6.16 | 5.5 | 1.8 | 4.40 | 8.93 | 0.7 | 0.9 | 0.8 | 0.0 | 0.7 | 0.92 | 0.9 |
|     |    | 0   | 8    |      | 7   | 9   |      |      | 8   | 2   | 6   | 7   | 8   |      | 2   |
|     | 7  | 0.2 | 20.6 | 9.38 | 5.2 | 5.1 | 9.60 | 13.8 | 0.8 | 0.9 | 0.8 | 0.0 | 0.8 | 0.86 | 0.9 |
|     |    | 1   | 1    |      | 0   | 2   |      | 3    | 6   | 2   | 8   | 3   | 6   |      | 2   |
|     | 8  | 0.3 | 27.1 | 9.79 | 6.3 | 3.8 | 9.62 | 14.8 | 0.8 | 0.8 | 0.8 | 0.0 | 0.8 | 0.86 | 0.8 |
|     |    | 2   | 0    |      | 7   | 5   |      | 6    | 6   | 6   | 6   | 0   | 6   |      | 6   |
|     | 9  | 0.0 | 16.7 | 4.99 | 4.0 | 1.8 | 3.96 | 7.42 | 0.8 | 0.8 | 0.8 | 0.0 | 0.8 | 0.85 | 0.8 |
|     |    | 5   | 8    |      | 5   | 2   |      |      | 5   | 6   | 5   | 0   | 5   |      | 5   |
|     | 10 | 0.0 | 5.74 | 1.00 | 1.1 | 0.2 | 0.57 | 1.23 | 0.8 | 0.8 | 0.8 | 0.0 | 0.8 | 0.85 | 0.8 |
|     |    | 1   |      |      | 3   | 1   |      |      | 5   | 5   | 5   | 0   | 5   |      | 5   |

—: No data

Table S3 (Continued)

| Year | Month | γ <sub>P</sub> |      |      |      |      |       |     | γ <sub>T</sub> |      |      |      |      |       |     |
|------|-------|----------------|------|------|------|------|-------|-----|----------------|------|------|------|------|-------|-----|
|      |       | Min            | Ma   | Ave  | Std. | Q1   | Media | Q3  | Min            | Ma   | Ave  | Std. | Q1   | Media | Q3  |
|      |       | x              | .    | .    | .    | n    | n     | x   | .              | .    | .    | .    | n    | n     | n   |
| 2023 | 6     | 0.0            | 1.56 | 0.68 | 0.4  | 0.3  | 0.64  | 0.9 | 0.2            | 1.50 | 0.66 | 0.3  | 0.4  | 0.59  | 0.8 |
|      |       | 0              |      |      | 0    | 4    |       | 8   | 1              |      |      | 0    | 1    |       | 7   |
|      | 7     | 0.0            | 1.52 | 0.95 | 0.4  | 0.5  | 1.06  | 1.3 | 0.5            | 2.53 | 1.31 | 0.4  | 0.8  | 1.24  | 1.6 |
|      |       | 0              |      |      | 2    | 8    |       | 4   | 6              |      |      | 9    | 8    |       | 5   |
|      | 8     | 0.0            | 1.61 | 0.84 | 0.3  | 0.4  | 0.87  | 1.2 | 0.4            | 2.00 | 1.19 | 0.3  | 1.0  | 1.18  | 1.4 |
|      |       | 2              |      |      | 9    | 9    |       | 1   | 7              |      |      | 0    | 0    |       | 0   |
|      | 9     | 0.0            | 1.31 | 0.67 | 0.3  | 0.3  | 0.65  | 0.9 | 0.2            | 1.57 | 0.94 | 0.3  | 0.6  | 1.02  | 1.2 |
|      |       | 2              |      |      | 3    | 8    |       | 7   | 3              |      |      | 4    | 8    |       | 3   |
|      | 10    | 0.0            | 1.00 | 0.52 | 0.2  | 0.2  | 0.53  | 0.7 | 0.1            | 0.71 | 0.36 | 0.1  | 0.2  | 0.36  | 0.4 |
|      |       | 4              |      |      | 6    | 8    |       | 7   | 2              |      |      | 3    | 7    |       | 5   |
|      | 11    | 0.0            | 0.76 | 0.38 | 0.2  | 0.1  | 0.39  | 0.5 | 0.0            | 0.68 | 0.25 | 0.1  | 0.1  | 0.18  | 0.3 |
|      |       | 0              |      |      | 1    | 9    |       | 8   | 4              |      |      | 7    | 2    |       | 8   |
| 12   | -     | -              | -    | -    | -    | -    | -     | -   | 0.0            | 0.05 | 0.03 | 0.0  | -    | -     | -   |
|      |       |                |      |      |      |      |       | 2   |                |      | 1    |      |      |       |     |
| 2024 | 1     | -              | -    | -    | -    | -    | -     | -   | -              | -    | -    | -    | -    | -     | -   |
|      |       |                |      |      |      |      |       |     |                |      |      |      |      |       |     |
|      | 2     | 0.0            | 0.93 | 0.51 | 0.2  | -    | -     | -   | 0.0            | 0.17 | 0.08 | 0.0  | -    | -     | -   |
|      |       | 3              |      |      | 7    |      |       |     | 3              |      |      | 4    |      |       |     |
|      | 3     | 0.0            | 1.15 | 0.60 | 0.3  | 0.3  | 0.61  | 0.9 | 0.0            | 1.06 | 0.17 | 0.2  | 0.0  | 0.09  | 0.1 |
|      |       | 2              |      |      | 2    | 3    |       | 1   | 4              |      |      | 0    | 7    |       | 5   |
|      | 4     | 0.0            | 1.42 | 0.62 | 0.3  | 0.2  | 0.55  | 0.9 | 0.0            | 0.82 | 0.33 | 0.1  | 0.1  | 0.35  | 0.4 |
|      |       | 3              |      |      | 8    | 7    |       | 8   | 6              |      |      | 7    | 7    |       | 4   |
|      | 5     | 0.0            | 1.48 | 0.76 | 0.4  | 0.3  | 0.73  | 1.1 | 0.1            | 0.94 | 0.43 | 0.1  | 0.3  | 0.41  | 0.5 |
|      |       | 3              |      |      | 2    | 9    |       | 9   | 2              |      |      | 7    | 0    |       | 6   |
|      | 6     | 0.0            | 1.66 | 0.76 | 0.4  | 0.3  | 0.73  | 1.1 | 0.1            | 1.65 | 0.67 | 0.3  | 0.4  | 0.63  | 0.8 |
|      |       | 0              |      |      | 4    | 7    |       | 8   | 9              |      |      | 3    | 2    |       | 1   |
| 7    | 0.0   | 1.53           | 0.73 | 0.4  | 0.3  | 0.72 | 1.1   | 0.3 | 2.95           | 1.35 | 0.5  | 0.9  | 1.34 | 1.8   |     |
|      | 0     |                |      | 4    | 4    |      | 4     | 5   |                |      | 8    | 1    |      | 0     |     |
| 8    | 0.0   | 1.45           | 0.82 | 0.4  | 0.4  | 0.88 | 1.2   | 0.4 | 1.89           | 1.23 | 0.3  | 1.0  | 1.27 | 1.4   |     |
|      | 2     |                |      | 2    | 5    |      | 2     | 6   |                |      | 5    | 1    |      | 7     |     |
| 9    | 0.0   | 1.31           | 0.67 | 0.3  | 0.3  | 0.66 | 1.0   | 0.2 | 1.62           | 0.94 | 0.4  | 0.5  | 1.02 | 1.3   |     |
|      | 1     |                |      | 7    | 2    |      | 3     | 7   |                |      | 2    | 1    |      | 3     |     |

|     |    |     |      |      |     |     |      |     |     |      |      |      |     |      |      |
|-----|----|-----|------|------|-----|-----|------|-----|-----|------|------|------|-----|------|------|
|     | 10 | 0.0 | 1.03 | 0.37 | 0.2 | 0.1 | 0.30 | 0.5 | 0.0 | 1.22 | 0.43 | 0.2  | 0.2 | 0.37 | 0.5  |
|     |    | 1   |      |      | 7   | 5   |      | 7   | 9   |      |      | 3    | 5   |      | 6    |
|     | 11 | 0.0 | 0.79 | 0.36 | 0.2 | 0.1 | 0.34 | 0.5 | 0.0 | 0.60 | 0.20 | 0.11 | 0.1 | 0.16 | 0.2  |
|     |    | 1   |      |      | 1   | 7   |      | 6   | 3   |      |      |      | 2   |      | 6    |
|     | 12 | 0.0 | 0.63 | 0.38 | 0.1 | 0.2 | 0.45 | 0.5 | 0.0 | 0.24 | 0.10 | 0.0  | 0.0 | 0.08 | 0.1  |
|     |    | 0   |      |      | 7   | 2   |      | 3   | 3   |      |      | 5    | 7   |      | 3    |
| 202 | 1  | 0.0 | 0.68 | 0.41 | 0.1 | 0.2 | 0.46 | 0.5 | 0.0 | 0.15 | 0.08 | 0.0  | 0.0 | 0.08 | 0.11 |
| 5   |    | 1   |      |      | 8   | 6   |      | 6   | 3   |      |      | 3    | 6   |      |      |
|     | 2  | 0.0 | 0.90 | 0.54 | 0.2 | 0.3 | 0.63 | 0.7 | 0.0 | 0.22 | 0.08 | 0.0  | 0.0 | 0.06 | 0.1  |
|     |    | 5   |      |      | 3   | 3   |      | 4   | 3   |      |      | 5    | 5   |      | 0    |
|     | 3  | 0.0 | 1.17 | 0.53 | 0.3 | 0.2 | 0.52 | 0.8 | 0.0 | 0.78 | 0.21 | 0.2  | 0.0 | 0.11 | 0.3  |
|     |    | 0   |      |      | 2   | 3   |      | 5   | 2   |      |      | 2    | 5   |      | 7    |
|     | 4  | 0.0 | 1.39 | 0.70 | 0.3 | 0.3 | 0.69 | 1.0 | 0.0 | 0.78 | 0.29 | 0.1  | 0.2 | 0.28 | 0.3  |
|     |    | 1   |      |      | 8   | 6   |      | 7   | 2   |      |      | 5    | 0   |      | 5    |
|     | 5  | 0.0 | 1.44 | 0.65 | 0.4 | 0.2 | 0.58 | 1.0 | 0.1 | 1.19 | 0.39 | 0.2  | 0.2 | 0.30 | 0.5  |
|     |    | 3   |      |      | 2   | 5   |      | 7   | 0   |      |      | 4    | 3   |      | 0    |
|     | 6  | 0.0 | 1.63 | 0.79 | 0.4 | 0.4 | 0.77 | 1.2 | 0.2 | 2.18 | 0.87 | 0.4  | 0.5 | 0.79 | 1.1  |
|     |    | 0   |      |      | 3   | 0   |      | 2   | 1   |      |      | 5    | 0   |      | 3    |
|     | 7  | 0.0 | 1.53 | 0.97 | 0.3 | 0.6 | 1.06 | 1.3 | 0.2 | 1.92 | 1.18 | 0.3  | 0.9 | 1.22 | 1.4  |
|     |    | 7   |      |      | 9   | 7   |      | 1   | 9   |      |      | 7    | 3   |      | 9    |
|     | 8  | 0.0 | 1.41 | 0.84 | 0.3 | 0.5 | 0.90 | 1.1 | 0.5 | 2.72 | 1.41 | 0.5  | 0.9 | 1.46 | 1.7  |
|     |    | 6   |      |      | 8   | 3   |      | 9   | 1   |      |      | 1    | 8   |      | 9    |
|     | 9  | 0.0 | 1.34 | 0.63 | 0.3 | 0.3 | 0.58 | 0.9 | 0.3 | 1.76 | 0.91 | 0.4  | 0.5 | 0.92 | 1.2  |
|     |    | 2   |      |      | 3   | 9   |      | 3   | 1   |      |      | 2    | 4   |      | 3    |
|     | 10 | 0.0 | 0.99 | 0.34 | 0.2 | 0.1 | 0.29 | 0.4 | 0.0 | 0.90 | 0.32 | 0.1  | 0.1 | 0.26 | 0.4  |
|     |    | 1   |      |      | 4   | 6   |      | 8   | 6   |      |      | 8    | 7   |      | 6    |

—: No data

Table S3 (Continued)

| Year | Month | Page |      |      |      |      |        |      |      |
|------|-------|------|------|------|------|------|--------|------|------|
|      |       | Min  | Max  | Ave. | Std. | Q1   | Median | Q3   |      |
| 2023 | 6     | 0.91 | 0.91 | 0.91 | 0.00 | 0.91 | 0.91   | 0.91 |      |
|      | 7     | 0.91 | 0.91 | 0.91 | 0.00 | 0.91 | 0.91   | 0.91 |      |
|      | 8     | 0.91 | 0.91 | 0.91 | 0.00 | 0.91 | 0.91   | 0.91 |      |
|      | 9     | 0.95 | 0.95 | 0.95 | 0.00 | 0.95 | 0.95   | 0.95 |      |
|      | 10    | 0.92 | 0.92 | 0.92 | 0.00 | 0.92 | 0.92   | 0.92 |      |
|      | 11    | 0.90 | 0.90 | 0.90 | 0.00 | 0.90 | 0.90   | 0.90 |      |
|      | 12    | 0.00 | 0.00 | 0.00 | –    | –    | –      | –    |      |
|      | 2024  | 1    | –    | –    | –    | –    | –      | –    | –    |
|      |       | 2    | 0.00 | 0.00 | 0.00 | –    | –      | –    | –    |
|      |       | 3    | 0.00 | 0.00 | 0.00 | 0.00 | 0.00   | 0.00 | 0.00 |
|      |       | 4    | 0.16 | 0.16 | 0.16 | 0.00 | 0.16   | 0.16 | 0.16 |
|      |       | 5    | 0.57 | 0.57 | 0.57 | 0.00 | 0.57   | 0.57 | 0.57 |
| 6    |       | 0.91 | 0.91 | 0.91 | 0.00 | 0.91 | 0.91   | 0.91 |      |
| 7    |       | 0.91 | 0.91 | 0.91 | 0.00 | 0.91 | 0.91   | 0.91 |      |
| 8    |       | 0.91 | 0.91 | 0.91 | 0.00 | 0.91 | 0.91   | 0.91 |      |
| 9    |       | 0.95 | 0.95 | 0.95 | 0.00 | 0.95 | 0.95   | 0.95 |      |
| 10   |       | 0.92 | 0.92 | 0.92 | 0.00 | 0.92 | 0.92   | 0.92 |      |
| 11   |       | 0.90 | 0.90 | 0.90 | 0.00 | 0.90 | 0.90   | 0.90 |      |
| 12   |       | 0.00 | 0.00 | 0.00 | 0.00 | 0.00 | 0.00   | 0.00 |      |
| 2025 | 1     | 0.00 | 0.00 | 0.00 | 0.00 | 0.00 | 0.00   | 0.00 |      |
|      | 2     | 0.00 | 0.00 | 0.00 | 0.00 | 0.00 | 0.00   | 0.00 |      |
|      | 3     | 0.00 | 0.00 | 0.00 | 0.00 | 0.00 | 0.00   | 0.00 |      |
|      | 4     | 0.16 | 0.16 | 0.16 | 0.00 | 0.16 | 0.16   | 0.16 |      |
|      | 5     | 0.57 | 0.57 | 0.57 | 0.00 | 0.57 | 0.57   | 0.57 |      |
|      | 6     | 0.91 | 0.91 | 0.91 | 0.00 | 0.91 | 0.91   | 0.91 |      |
|      | 7     | 0.91 | 0.91 | 0.91 | 0.00 | 0.91 | 0.91   | 0.91 |      |
|      | 8     | 0.91 | 0.91 | 0.91 | 0.00 | 0.91 | 0.91   | 0.91 |      |
|      | 9     | 0.95 | 0.95 | 0.95 | 0.00 | 0.95 | 0.95   | 0.95 |      |
|      | 10    | 0.92 | 0.92 | 0.92 | 0.00 | 0.92 | 0.92   | 0.92 |      |

–: No data
